# Supplementary material for: Synthesis and structures of 5-(pyridyl)tetrazole complexes of Mn(ii)
Source: Royal Society of Chemistry journal article supplement (doi:10.1039/b505077d), 2005-01-01
Supplement: b505077d.pdf [file b505077d.pdf]

## Supporting Information

### Synthesis and Structures of 5-(pyridyl)tetrazole Complexes of Mn(II)

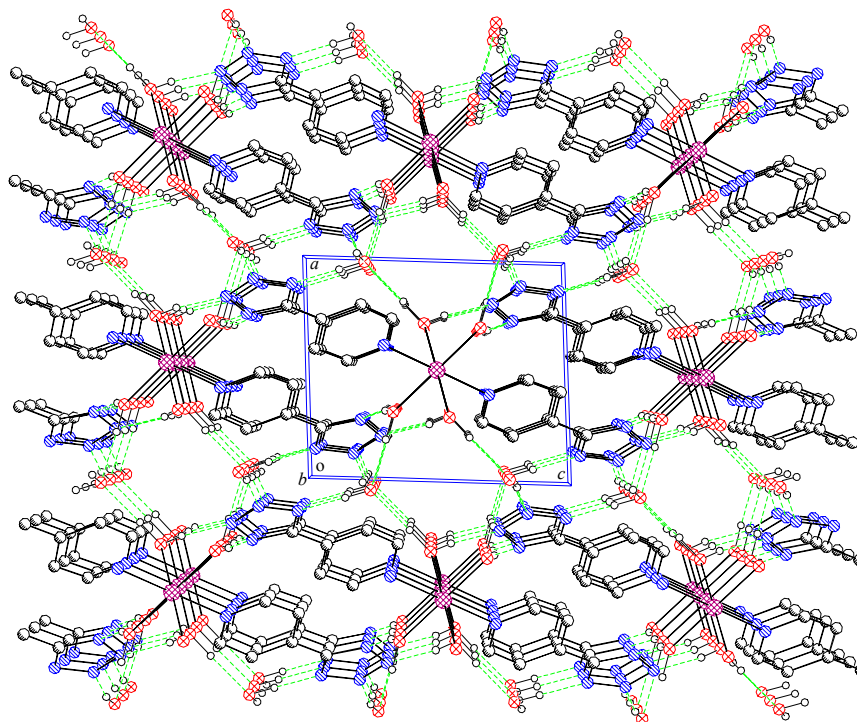

Three-dimensional structure of **3** supported by hydrogen bonds, with hydrogen atoms on carbons omitted.

Remove all uncoordinated water molecules

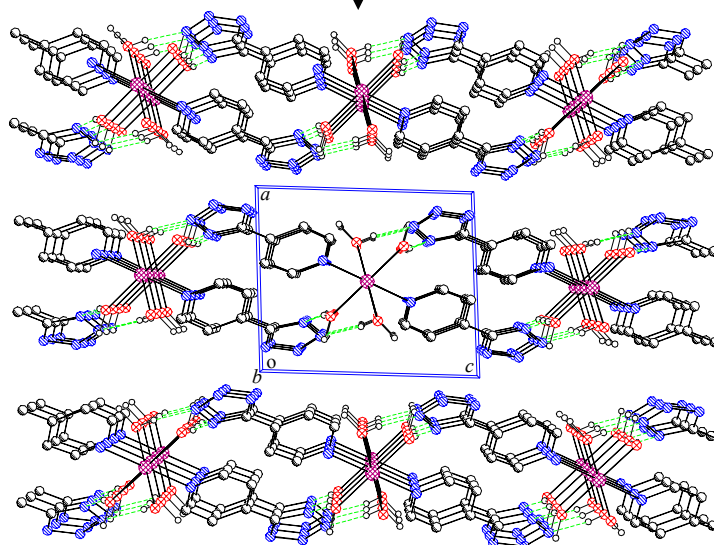

Three layers of two-dimensional framework consisting of  $[\text{Mn}\{5\text{-(4-pyridyl)-tetrazolato}\}_2(\text{H}_2\text{O})_4]$  units linked by 'inter-molecule' hydrogen bonds
